# Supplementary material for: Prognostic Value of Gated Myocardial Perfusion Imaging for Asymptomatic Patients With Type 2 Diabetes: The J-ACCESS 2 investigation
Source: PubMed Central journal article supplement — Diabetes Care. 2010 Aug 19;33(11):2320–6. doi: 10.2337/dc09-2370 (PMC2963487; doi:10.2337/dc09-2370), 2010-08-19
Supplement: supp_dc09-2370_dc092370onlineappendix.pdf [file supp_dc09-2370_dc092370onlineappendix.pdf]

## Appendix

The J-ACCESS 2 Study Investigators

Chief investigator: Tsunehiko Nishimura

Steering Committee: Hideo Kusuoka, Yoshimitsu Yamasaki, Tohru Izumi, Atsunori Kashiwagi, Ryuzou Kawamori, Kazuaki Shimamoto, Nobuhiro Yamada, Eiichi Araki, Shinichiro Kumita, Yasuchika Takeishi, Tomoaki Nakata, Yasunao Yoshimasa, Kenichi Nakajima, Tsutomu Hirano

Investigators: Tomoaki Nakata (Sapporo Medical University Hospital), Takayuki Matsuki (Shinnittetsu Muroran General Hospital), Tomiyoshi Saito (Shirakawa Kousei General Hospital), Yasuchika Takeishi (Yamagata University Faculty of Medicine), Ikuo Segawa (Iwate Medical University), Hiroshi Ito (Akita University Hospital), Masayasu Nakagawa (Akita City Hospital), Megumi Shimada (Kitasato Institute Hospital), Asako Sato (Tokyo Women's Medical University Hospital), Masao Moroi (Toho University Ohashi Medical Center), Junichi Yamazaki (Toho University Omori Medical Center), Susumu Nakagawa (Tokyo Saiseikai Central Hospital), Mitsuhiro Noda (Toranomon Hospital), Masao Ota (Nippon Medical School Hospital), Shigeyuki Nishimura (Saitama Medical University Hospital), Takuji Toyama (Gunma Prefectural Cardiovascular Center), Toru Izumi (Kitasato University Hospital), Nobuhiko Maejima (Fujisawa City Hospital), Kazuya Yamamoto (Iida Municipal Hospital), Nobuhiro Yamada (University of Tsukuba), Hiroshi Asano (Tosei General Hospital), Hisato Takatsu (Gifu Municipal Hospital), Yutaka Noto (Kanazawa National Hospital), Kenichi Nakajima (Kanazawa University Hospital), Hideyuki Tsuboi (Ogaki Municipal Hospital), Takeshi Kimura (Kyoto University Hospital), Naoto Nakamura (Kyoto Prefectural University of Medicine), Hiroshi Fujita (Kyoto Second Red Cross Hospital), Shinro Matsuo (Shiga University of Medical Science), Mitsuhiro Yokoyama (Kobe University Graduate School of Medicine), Teishi Kajiya (Hyogo Brain and Heart Center), Takao Mori (Miki City Hospital), Mitsukazu Yamane (Kawasaki Hospital), Masatoshi Shimizu (National Hospital Organization Kobe Medical Center), Takakazu Morozumi (Kansai Rosai Hospital), Hisakazu Fuji (Kobe Ekisaikai Hospital), Yoshimitsu Yamasaki (Osaka University Graduate School of Medicine), Yukihiro Koretsune (National Hospital Organization Osaka National Hospital), Yoshiyuki Kijima (Higashiosaka City General Hospital), Kazuya Takehana (Kansai Medical University), Yoshiyuki Nagai (Rinku General Medical Center), Yoshio Kawase (Izumi Municipal Hospital), Shoji Kitaguchi (Keihanna Hospital), Ryuji Nohara (Kitano Hospital), Yutaka Hayashi (Uwajima Social Insurance Hospital), Mitsunori Abe (Matsuyama Shimin Hospital), Nobuo Fukuda (National Hospital Organization Zentsuji National Hospital), Hirofumi Matsuda (Saiseikai Kumamoto Hospital), Kazuya Matsumoto (Kumamoto University School of Medicine), Mitsuhiro Nakazaki (Kagoshima University Hospital)
